# Supplementary material
Source: MDPI journal article supplement (https://www.mdpi.com/2076-3417/12/9/4794)
Supplement: s1 [file s1]

## Supplementary Materials

**Table S1.** Search strings employed during the electronic search and number of records retrieved.

| Database       | String                                                                                                                                                                                                                                                                                                      | Number of records retrieved |
|----------------|-------------------------------------------------------------------------------------------------------------------------------------------------------------------------------------------------------------------------------------------------------------------------------------------------------------|-----------------------------|
| Pubmed         | (cryostimulation OR cryotherapy OR cryochamber OR cryosauna OR "cold immersion" OR "cold shock" OR "cold therapy" OR "cold exposure") AND (fibromyalgia OR "myofascial pain" OR "chronic generalized pain" OR "chronic widespread pain" OR fibrositis OR fibromyositis)                                     | 28                          |
| Scopus         | ( TITLE-ABS-KEY ( cryostimulation OR cryotherapy OR cryochamber OR cryosauna OR "cold immersion" OR "cold shock" OR "cold therapy" OR "cold exposure" ) AND TITLE-ABS-KEY ( fibromyalgia OR "myofascial pain" OR "chronic generalized pain" OR "chronic widespread pain" OR fibrositis OR fibromyositis ) ) | 100                         |
| Embase         | (fibromyalgia OR 'myofascial pain' OR 'chronic generalized pain' OR 'chronic widespread pain' OR fibrositis OR fibromyositis) AND (cryostimulation OR cryotherapy OR cryochamber OR cryosauna OR 'cold immersion' OR 'cold shock' OR 'cold therapy' OR 'cold exposure')                                     | 107                         |
| Web of Science | fibromyalgia (All Fields) and costimulation OR cryotherapy OR crio chamber OR cryosauna OR "cold immersion" OR "cold shock" OR "cold therapy" OR "cold exposure" (All Fields)                                                                                                                               | 28                          |
